# Supplementary material for: The Major Constituent of Green Tea, Epigallocatechin-3-Gallate (EGCG), Inhibits the Growth of HPV18-Infected Keratinocytes by Stimulating Proteasomal Turnover of the E6 and E7 Oncoproteins
Source: MDPI journal article supplement (doi:10.3390/pathogens10040459), 2021-04-11
Supplement: s1 [file s1]

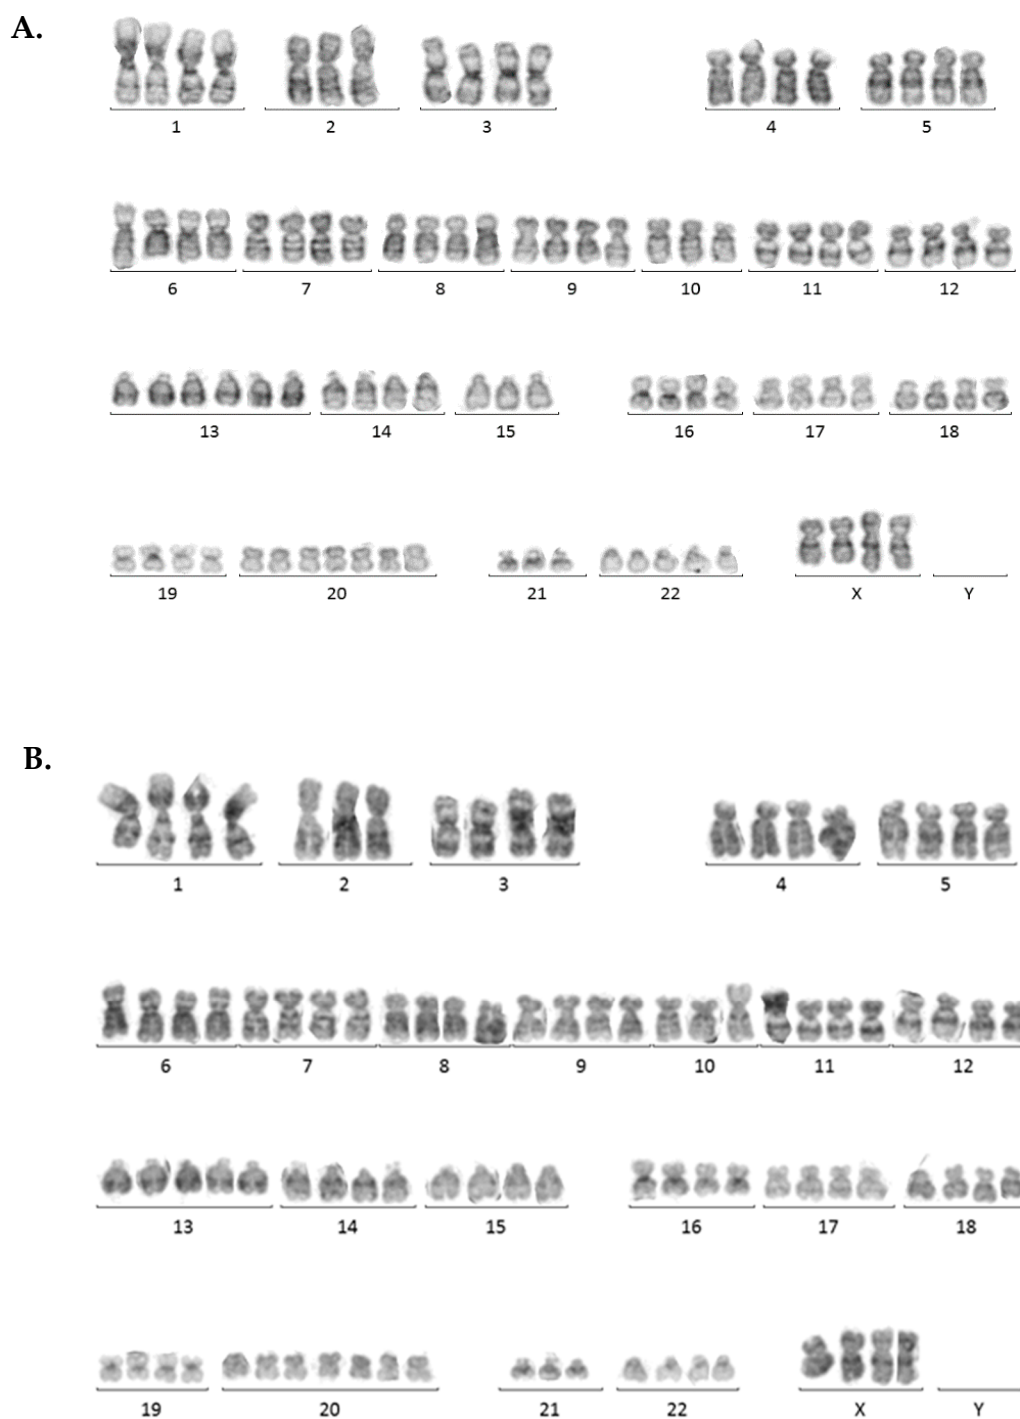

**Figure S1. Representative karyotypes from two additional major clones identified in primary cultures of VIN cl.11.** Chromosome alignment of G-banded chromosomes taken from two additional major clones (A) clone 1, and (B), clone 3 found in early passage cultures of VIN cl.11. This analysis confirmed the near-tetraploid nature of chromosomes and the absence of a Y chromosome.

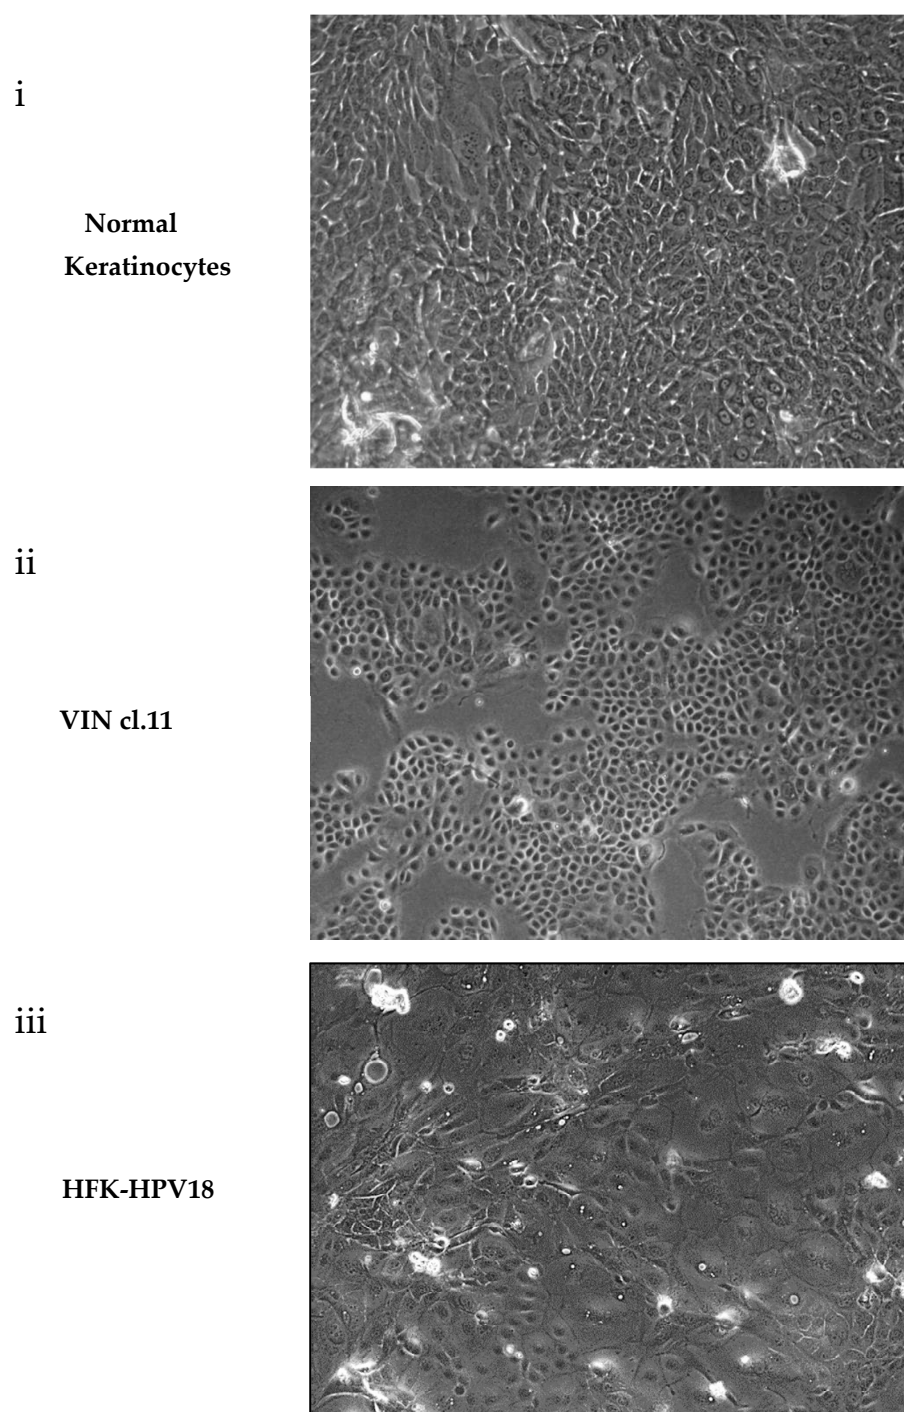

**Figure S2. The morphology of VIN cl.11 in monolayer culture.** The morphology of (i) normal vulvar keratinocytes, (ii) VIN cl.11 and (iii) HFK-HPV18 in monolayer cultures. Keratinocytes were seeded at clonal density on irradiated 3T3-J2 fibroblasts. After seven days, the feeder cells were removed and a phase contrast image taken using a Nikon Eclipse E600 microscope at  $\times 200$  magnification.

Table S1. Cell lines and culture media.

| Cell line | Source                                | Origin                                                                                                    | Tissue culture media and supplements                                                                                                                                                                                                                                                                                                                                                                                                                                                                                          |
|-----------|---------------------------------------|-----------------------------------------------------------------------------------------------------------|-------------------------------------------------------------------------------------------------------------------------------------------------------------------------------------------------------------------------------------------------------------------------------------------------------------------------------------------------------------------------------------------------------------------------------------------------------------------------------------------------------------------------------|
| A431      | E Odintsova, University of Birmingham | Derived from vulval epidermal carcinoma of a 85-year old women                                            | Dulbecco's Modified Eagle's Medium (DMEM) (Gibco, UK) supplemented with 10% v/v fetal bovine serum (FBS), 100U/ml penicillin, 100mg/l streptomycin and 4mM L-glutamine (Gibco, UK)                                                                                                                                                                                                                                                                                                                                            |
| HeLa      | S Roberts University of Birmingham    | Derived from cervical carcinoma of a 31-year old female; contains integrated form of HPV 18 genomes       | DMEM (Gibco, UK) supplemented with 10% v/v fetal bovine serum (FBS), 100U/ml penicillin, 100mg/l streptomycin and 4mM L-glutamine (Gibco, UK).                                                                                                                                                                                                                                                                                                                                                                                |
| HFK-HPV18 |                                       | Derived from infant foreskin keratinocytes and transfected with episomal form of HPV 18                   | <b>E-media:</b> DMEM 60% v/v (Gibco, UK), Ham's F12 32% v/v (Gibco, UK), PenStrep 10,000 U/mL 2% v/v (Gibco, UK), hydrocortisone 0.1% v/v (Sigma, UK), HyClone Defined FBS 10% v/v (Fisher Scientific, UK), mouse epidermal growth factor (EGF) 5ng/ml (BD Biosciences, UK), L-glutamine 2mM (Gibco, UK), cholera toxin A 0.1% v/v (Sigma Aldrich, UK), insulin 0.2% v/v (Sigma Aldrich, UK), transferrin 0.2% v/v (Sigma Alrich, UK), tri-iodo-L-thyronine T3 4 nM (Sigma Aldrich, UK) and adenine 36 µM (Sigma Aldrich, UK) |
| 3T3-J2    |                                       | Mouse embryonic fibroblast cell line. Used after $\gamma$ -irradiation as feeder cells for keratinocytes. | DMEM, HEPES modified, (Sigma-Aldrich, UK) supplemented with 10% v/v new born calf serum, 4mM L-glutamine and 100U/ml penicillin and 100mg/l streptomycin                                                                                                                                                                                                                                                                                                                                                                      |
| VIN cl.11 | Generated as part of this study       | Primary premalignant keratinocyte clone isolated from a uVIN biopsy                                       | 1:1 RPMI 1640 media and Ham's F12 nutrient mixture media containing 5% v/v foetal calf serum (FCS), 0.4µg/ml hydrocortisone, 10ng/ml EGF, 100U/ml penicillin, 100mg/l streptomycin                                                                                                                                                                                                                                                                                                                                            |

**Table S2. Antibodies and Chemicals used in this study.**

| Antibody                     | 1° or 2° | Manufacturer                                     | Catalogue code | Species | Dilutions              |
|------------------------------|----------|--------------------------------------------------|----------------|---------|------------------------|
| β-actin                      | 1°       | Sigma-Aldrich, UK                                | A5316          | Mouse   | WB 1:1000              |
| ΔNp63                        | 1°       | Santa-Cruz                                       | sc-8431        | Mouse   | IHC 1:200              |
| HPV18 E4                     | 1°       | Dr S Roberts<br>University of<br>Birmingham [14] | n/a            | Mouse   | IHC 1:5                |
| HPV18 E6                     | 1°       | Santa-Cruz                                       | sc-365089      | Mouse   | WB 1:100               |
| HPV18 E7                     | 1°       | Abcam                                            | ab100953       | Mouse   | WB 1:1000              |
| Involucrin                   | 1°       | Sigma                                            | SY5            | Mouse   | WB 1:200<br>IHC 1:100  |
| K1/K10                       | 1°       | Sigma-Aldrich, UK                                | 8.60           | Mouse   | IHC 1:100              |
| Ki67                         | 1°       | Dako                                             | MIB-1          | Mouse   | IHC 1:100              |
| MCM7                         | 1°       | Sigma-Aldrich, UK                                | 17931          | Mouse   | WB 1:2000<br>IHC 1:200 |
| p16 <sup>INK4a</sup>         | 1°       | Abcam                                            | ab7962         | Mouse   | WB 1:200<br>IHC 1:50   |
| p21 <sup>WAF1</sup>          | 1°       | Santa-Cruz                                       | sc-397         | Rabbit  | WB 1:100<br>IHC 1:100  |
| p53                          | 1°       | Dr RJ Grand<br>University of<br>Birmingham       | n/a            | Mouse   | WB 1:100<br>IHC 1:100  |
| pRb                          | 1°       | Cell Signalling                                  | 9309S          | Mouse   | WB 1:1000<br>IHC 1:100 |
| Anti-Mouse-HRP               | 2°       | Dako                                             | P0447          | Goat    | WB 1:1000              |
| Anti-Rabbit-HRP              | 2°       | Dako                                             | P0448          | Goat    | WB 1:1000              |
| Anti-Mouse<br>AlexaFluor488  | 2°       | Invitrogen                                       | A32723         | Goat    | ICC 1:1000             |
| Anti-Rabbit<br>AlexaFluor488 | 2°       | Invitrogen                                       | A32731         | Goat    | ICC 1:1000             |

| Chemical      | Manufacturer           | Catalogue code | Diluent |
|---------------|------------------------|----------------|---------|
| EGCG          | Tocris, UK             | 4524           | H2O     |
| MG132         | Caymen<br>Chemical, UK | 10012628       | DMSO    |
| Cisplatin     | Tocris, UK             | 2251           | H2O     |
| Cycloheximide | Sigma-<br>Aldrich, UK  | C4859          | DMSO    |
